# Supplementary material
Source: Royal Society of Chemistry journal article supplement (doi:10.1039/d6cy00020g)
Supplement: d6cy00020g1.pdf [file d6cy00020g1.pdf]

## Supplementary Information

### The photo-assisted methane dry reforming over Ni-Co-CeO<sub>2</sub>-Al<sub>2</sub>O<sub>3</sub> catalyst with enhanced activity: synergistic effect of Ni and Co

Jiming Wang,<sup>a</sup> Min Ji<sup>\*a</sup> and Min Wang<sup>\*a</sup>

<sup>a</sup> School of Chemistry, Dalian University of Technology, Dalian 116024, PR China

E-mail: jimmin@dlut.edu.cn, wangmin@dlut.edu.cn

#### 1 Kinetic studies

2 Determining the carbon gasification rate by using CO<sub>2</sub> oxidation of deposited  
3 carbon over spent catalysts was used as follows, which was based on a modified  
4 Wigner–Polanyi equation (often used to generate kinetic data for TPD process).<sup>1</sup> As  
5 only small amount of surface carbon was identified on spent catalysts, and most of  
6 which can be gasified by CO<sub>2</sub> via reverse Boudouard reaction (Eq. 1) to CO, by  
7 assuming that the reverse reaction and re-adsorption are negligible, the following  
8 gasification kinetic law (Eq. 2) applies to the CO<sub>2</sub> surface gasification process.<sup>2</sup> These  
9 conditions are satisfied under our CO<sub>2</sub>-excessive CO<sub>2</sub>-TPO conditions operating under  
10 the high flow rate of carrier gas (He, 30 ml min<sup>-1</sup>), and first order reaction to surface  
11 carbon concentration was identified before.<sup>1</sup>

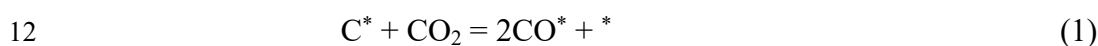

$$13 \quad r = -\frac{d\theta^*}{dt} = A\theta^* \exp\left[-\frac{E_a}{RT}\right] \times P_{CO_2}^n \quad (2)$$

14 Where A is the pre-exponential factor,  $\theta^*$  is the surface carbon coverage,  $E_a$  is the  
15 activation energy and n is the reaction order with respect to CO<sub>2</sub> partial pressure. R and  
16 T are the universal gas constant and temperature, respectively. To determine the kinetic

17 parameters, A, n and  $E_a$  need to be identified by regression. All samples were outgassed  
 18 to 120 °C to remove surface contaminants during post-tests handlings under  $N_2$  for 1 h,  
 19 such as water. In the first series experiments, we used a tiny amount of spent catalysts  
 20 (typically 10 mg) and a pure flow of  $CO_2$ , in order that the concentration variation of  
 21  $CO_2$  can be deemed as constant. The samples placed at the bottom of the Ushaped quartz  
 22 tube were investigated by heating the samples from 30 °C to 900 °C in  $CO_2$  (100 vol.%)  
 23 flow (30 ml  $min^{-1}$ ) at heating rates of 4, 7, 10, 15 °C  $min^{-1}$ , respectively. The  $CO_2$   
 24 consumption was monitored by a TCD. Under such circumstances, a pseudo zeroth  
 25 kinetic order for  $P_{CO_2}^n$  applies, and  $E_a$  could therefore be measured by changing ramp  
 26 of heating for  $CO_2$ -TPO,

$$27 \quad r = -\frac{d\theta^*}{dt} = A\theta^* \exp\left[-\frac{E_a}{RT}\right] \times P_{CO_2}^n = AP_{CO_2}^n \theta^* \exp\left[-\frac{E_a}{RT}\right]$$

28 (3)

29  $AP_{CO_2}^n$  can be regarded as an invariable, for the exceedingly high partial pressure  
 30 and small consumption.

31 During the TPO analysis, the temperature is increased linearly by:

$$32 \quad T_t = T_0 + \beta t \quad (4)$$

33 Where  $\beta = dT/dt$  and  $T_0$  is the initial temperature. Thus:

$$34 \quad -\frac{d\theta^*}{dT}\beta = AP_{CO_2}^n \theta^* \exp\left[-\frac{E_a}{RT}\right] \quad (5)$$

35 If  $T_M$  is the maximum temperature of a given TPO spectrum, then:

$$36 \quad \frac{d}{dT}\left[\theta^* \left(\frac{AP_{CO_2}^n}{RT}\right) \exp\left(-\frac{E_a}{RT}\right)\right] = 0 \quad (6)$$

$$2\ln T_M - \ln\beta = \frac{E_a}{RT_M} + \ln\left(\frac{E_a}{AP_{CO_2}^n R}\right) \quad (7)$$

2lnT<sub>M</sub> - lnβ vs. 1/T<sub>M</sub> curve can be used to deduce E<sub>a</sub> from the slope.

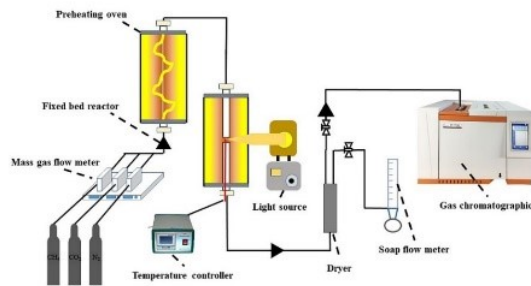

40

41

**Fig. S1** Diagram of experimental device.

42

43

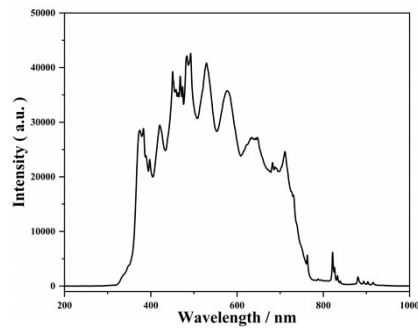

44

**Fig. S2** Spectrum of 300 W xenon light source intensity for PTC-DRM reaction.

46

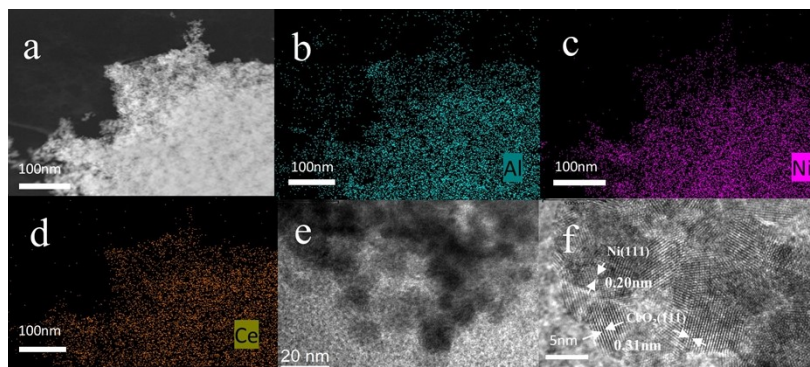

47

48

**Fig. S3** TEM images with element mapping (a-d), TEM (e), HRTEM (f) of the

49

Ni-Ce-Al sample.

50

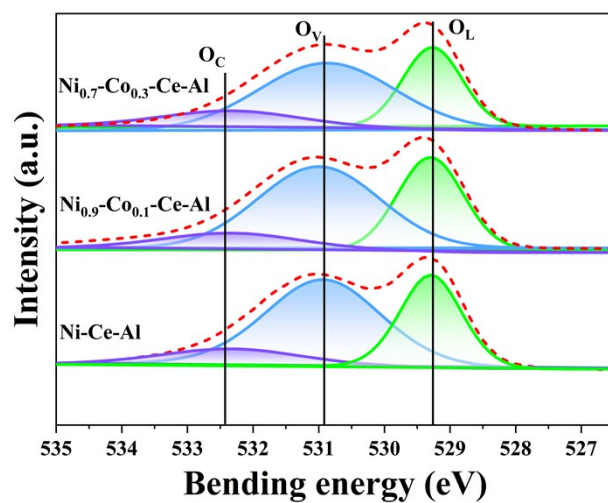

51

52 **Fig. S4** O 1s XPS spectra of reduced Ni-Ce-Al, Ni<sub>0.9</sub>-Co<sub>0.1</sub>-Ce-Al and Ni<sub>0.7</sub>-  
53 Co<sub>0.3</sub>-Ce-Al.

54

55 **Table S1** XPS characterization results of the reduced catalysts

| Samples                                     | Ni-Ce-Al | Ni <sub>0.9</sub> -Co <sub>0.1</sub> -Ce-Al | Ni <sub>0.7</sub> -Co <sub>0.3</sub> -Ce-Al |
|---------------------------------------------|----------|---------------------------------------------|---------------------------------------------|
| O 1s(O <sub>V</sub> /O <sub>C</sub> ) ratio | 3.29     | 3.18                                        | 2.97                                        |
| O 1s(O <sub>V</sub> /O <sub>L</sub> ) ratio | 1.29     | 1.22                                        | 1.18                                        |

56

57

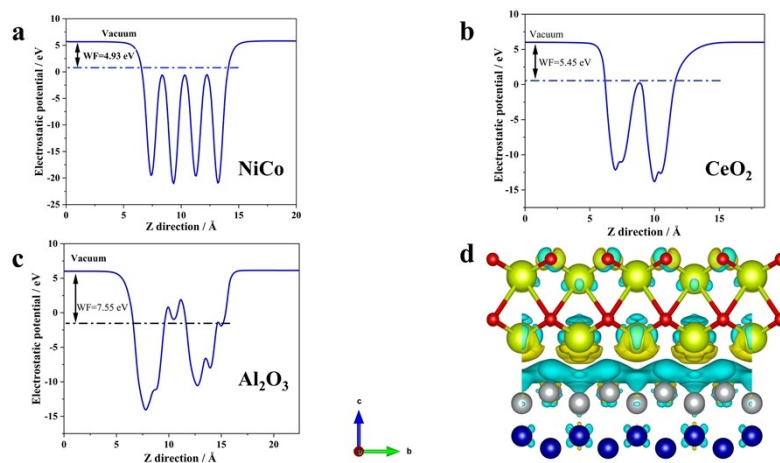

58

59 **Fig. S5** Electrostatic potentials of NiCo (a), CeO<sub>2</sub> (b), Al<sub>2</sub>O<sub>3</sub> (c) and the side view (d).

60

62 **Table S2** Comparison of catalyst performance with data in the literature.

| Entry | Sample                                      | Operating temperature (OA);<br>Actual temperature of catalyst (AT) | Reactor type      | Conditions                                                                                                                                                                                                     | Production rates of CO and H <sub>2</sub> (P <sub>CO</sub> and P <sub>H<sub>2</sub></sub> )               | Ref       |
|-------|---------------------------------------------|--------------------------------------------------------------------|-------------------|----------------------------------------------------------------------------------------------------------------------------------------------------------------------------------------------------------------|-----------------------------------------------------------------------------------------------------------|-----------|
| 1     | 10Ni/Al <sub>2</sub> O <sub>3</sub>         | OT = 550 °C<br>AT = NR                                             | Flow-type reactor | LA-251Xe lamp with a HA30 filter (UV-visible light of 300–800 nm, 1.07 W cm <sup>-2</sup> ); 50 mg sample; Total feed flow rate is 20.0 mL/min (CH <sub>4</sub> /CO <sub>2</sub> = 1: 1); atmospheric pressure | P <sub>CO</sub> ≈ 6.5 μmol min <sup>-1</sup><br>P <sub>H<sub>2</sub></sub> ≈ 6 μmol min <sup>-1</sup>     | 3         |
| 2     | Pt/black<br>TiO <sub>2</sub>                | OT = 550 °C<br>AT = NR                                             | Flow-type reactor | AM 1.5 G Newport solar simulator (100 mW/cm <sup>2</sup> ); 15 mg sample; CH <sub>4</sub> /CO <sub>2</sub> mixture gas (CH <sub>4</sub> /CO <sub>2</sub> = 1.0; GHSV = 40000 mL/g <sub>cat</sub> /h)           | P <sub>CO</sub> = 39 μmol min <sup>-1</sup><br>P <sub>H<sub>2</sub></sub> = 17 μmol min <sup>-1</sup>     | 4         |
| 3     | Pt-Si-CeO <sub>2</sub>                      | OT = 600 °C<br>AT = 600 °C                                         | Flow-type reactor | A custom-made solar simulator (250–800 nm, 1775 mWcm <sup>-2</sup> ); 10 mg sample; Total feed flow rate is 14 mL/min (CH <sub>4</sub> /CO <sub>2</sub> = 1:1)                                                 | P <sub>CO</sub> = 24 μmol min <sup>-1</sup><br>P <sub>H<sub>2</sub></sub> = 15 μmol min <sup>-1</sup>     | 5         |
| 4     | MgO/Pt/Zn-CeO <sub>2</sub>                  | OT = 600 °C<br>AT = 600 °C                                         | Flow-type reactor | A concentrated solar simulator (1200 W); 5 mg sample; 10% CH <sub>4</sub> and 10% CO <sub>2</sub> ; Total feed flow rate is 14 mL/min (CH <sub>4</sub> /CO <sub>2</sub> = 1:1); 1.01 × 10 <sup>5</sup> Pa      | P <sub>CO</sub> = 43 μmol min <sup>-1</sup><br>P <sub>H<sub>2</sub></sub> = 29 μmol min <sup>-1</sup>     | 6         |
| 5     | Ni <sub>0.9</sub> -Co <sub>0.1</sub> -Ce-Al | OT = 650 °C<br>AT = 650 °C                                         | Flow-type reactor | 300 W Xe-lamp; 60 mg sample; Total feed flow rate is 60.0 mL/min (CH <sub>4</sub> /CO <sub>2</sub> = 1:1); atmospheric pressure                                                                                | P <sub>CO</sub> = 27.7 μmol min <sup>-1</sup><br>P <sub>H<sub>2</sub></sub> = 23.6 μmol min <sup>-1</sup> | This work |

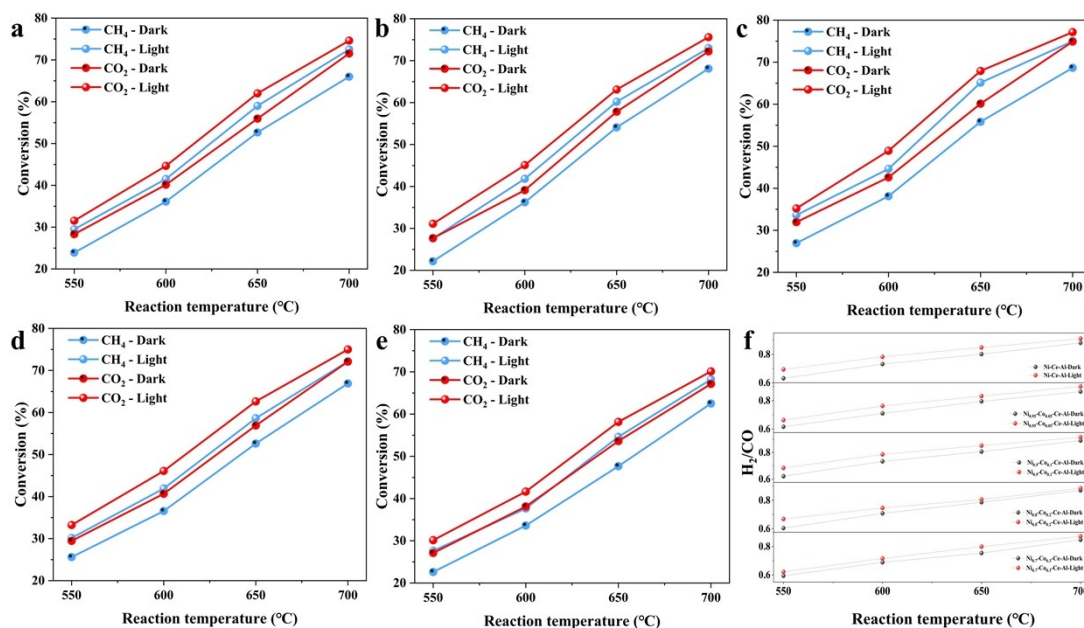

64  
 65 **Fig. S6** (a) Ni-Ce-Al, (b) Ni<sub>0.95</sub>-Co<sub>0.05</sub>-Ce-Al, (c) Ni<sub>0.9</sub>-Co<sub>0.1</sub>-Ce-Al, (d) Ni<sub>0.8</sub>-Co<sub>0.2</sub>-Ce-  
 66 Al and (e) Ni<sub>0.7</sub>-Co<sub>0.3</sub>-Ce-Al catalysts for PTC-DRM reaction and (f) H<sub>2</sub>/CO.  
 67 (Reaction conditions: WHSV = 60000 mL·g<sup>-1</sup>·h<sup>-1</sup>, CH<sub>4</sub> / CO<sub>2</sub>=1 / 1)

68

69

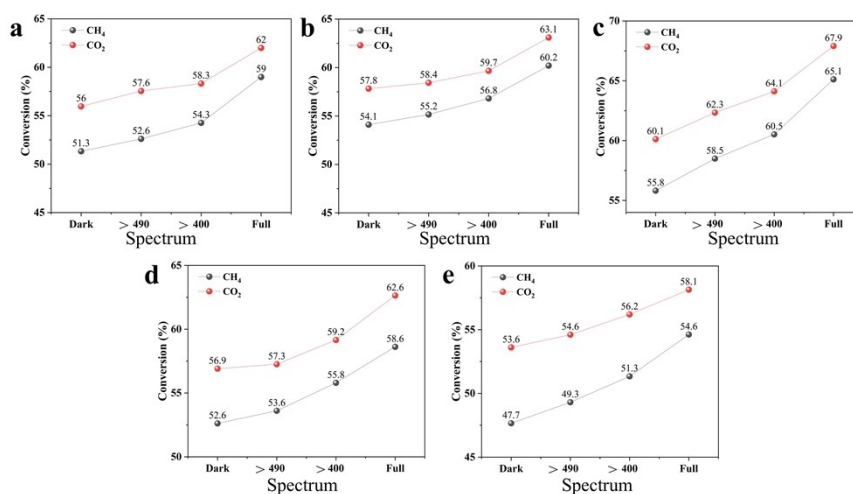

70

71 **Fig. S7** Effect of different wavelengths of light source at 650°C on the catalytic  
 72 performance of (a) Ni-Ce-Al, (b) Ni<sub>0.95</sub>-Co<sub>0.05</sub>-Ce-Al, (c) Ni<sub>0.9</sub>-Co<sub>0.1</sub>-Ce-Al, (d) Ni<sub>0.8</sub>-  
 73 Co<sub>0.2</sub>-Ce-Al and (e) Ni<sub>0.7</sub>-Co<sub>0.3</sub>-Ce-Al (Reaction conditions : WHSV=60000 mL·g<sup>-1</sup>·h<sup>-1</sup>  
 74 <sup>1</sup>, CH<sub>4</sub> / CO<sub>2</sub>=1 / 1)

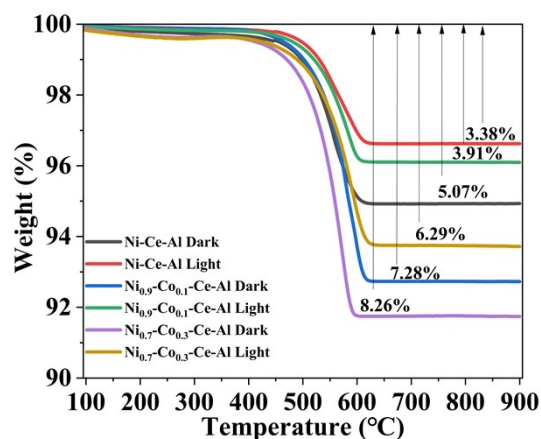

75

76 **Fig. S8** Thermogravimetric curves of Ni-Ce-Al, Ni<sub>0.9</sub>-Co<sub>0.1</sub>-Ce-Al and Ni<sub>0.7</sub>-Co<sub>0.3</sub>-Ce-Al  
 77 Al catalysts after thermal catalytic and photothermal catalytic reactions.

78

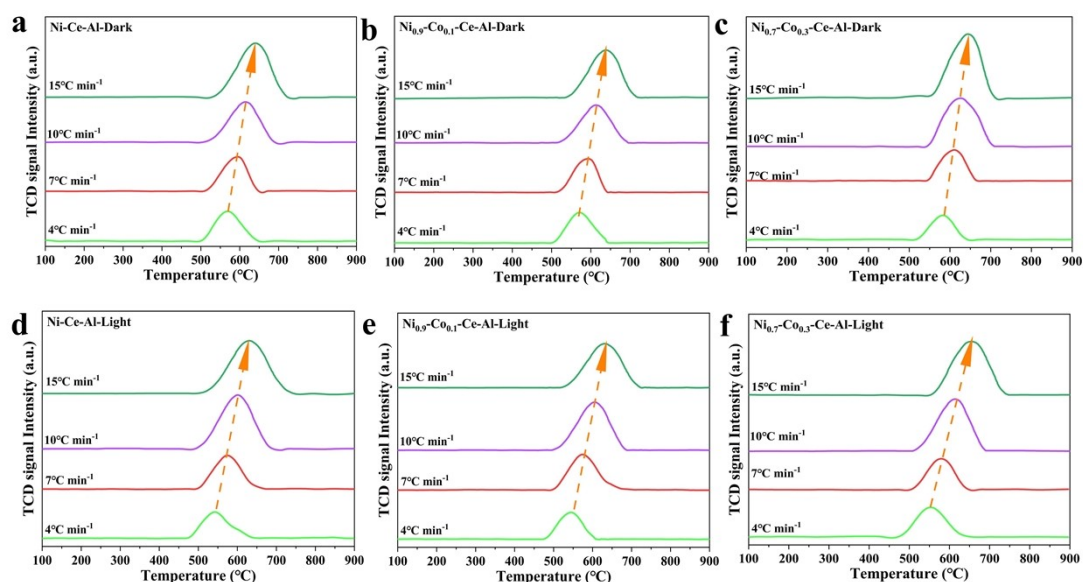

79

80

81 **Fig. S9** CO<sub>2</sub>-TPO patterns for Ni-Ce-Al (a, d), Ni<sub>0.9</sub>-Co<sub>0.1</sub>-Ce-Al (b, e) and Ni<sub>0.7</sub>-Co<sub>0.3</sub>-  
 82 Ce-Al (c, f) with manipulated heating rates of 4, 7, 10, 15 °C min<sup>-1</sup> from 100 °C to  
 83 900 °C under dark and light conditions respectively.

84 References:

- 85 1. H. Zhou, T. Zhang, Z. Sui, Y.-A. Zhu, C. Han, K. Zhu and X. Zhou, Appl. Catal.  
86 B-Environ. 2018, **233**, 143-159.
- 87 2. T. Osaki, Catal. Lett. 2015, **145**, 1931-1940.
- 88 3. H. Liu, H. Song, W. Zhou, X. Meng and J. Ye, Angew. Chemie Int. Ed. English,  
89 2018, **57**, 16781-16784.
- 90 4. H. Liu, T.D. Dao, L. Liu, X. Meng, T. Nagao and J. Ye, Appl. Catal. B-Environ.  
91 2017, **209**, 183-189.
- 92 5. F. Pan, X. Xiang, W. Deng, H. Zhao, X. Feng and Y. Li, ChemCatChem, 2018, **10**,  
93 940-945.
- 94 6. F. Pan, X. Xiang, Z. Du, E. Sarnello, T. Li and Y. Li, Appl. Catal. B-Environ. 2020,  
95 **260**, 118189.
